# Supplementary material for: The mechanism of variability in transcription start site selection
Source: eLife journal article supplement (doi:10.7554/elife.32038), 2017-11-23
Supplement: supp [file elife_poa_e32038_Figure_4_figure_supplement_1.pdf › elife_poa_e32038_Figure_4_figure_supplement_1.pdf]

Figure 4-figure supplement 1

A

positively supercoiled DNA

2.0 kb DNA segment

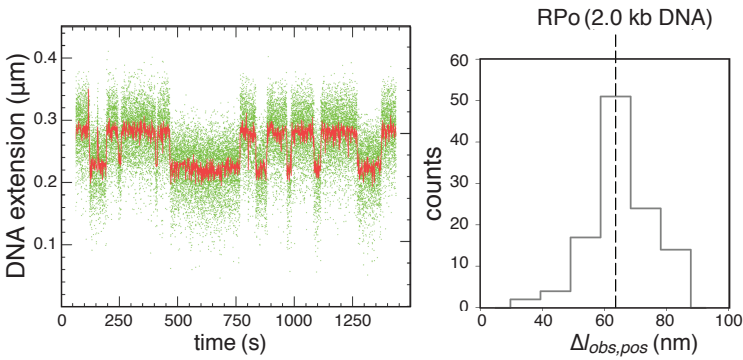

negatively supercoiled DNA

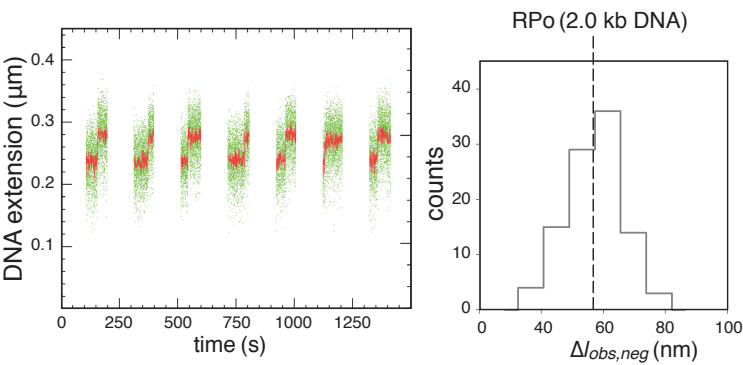

B

1.3 kb DNA segment

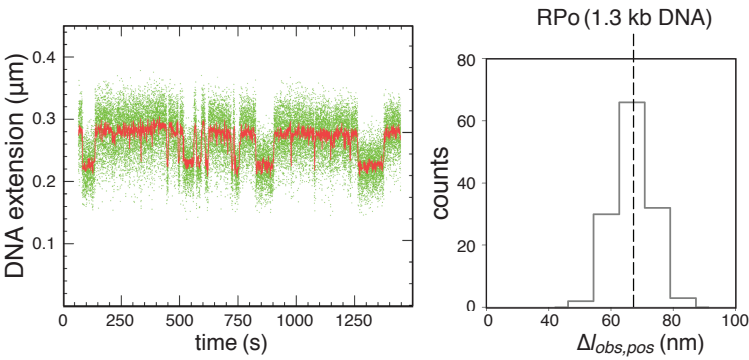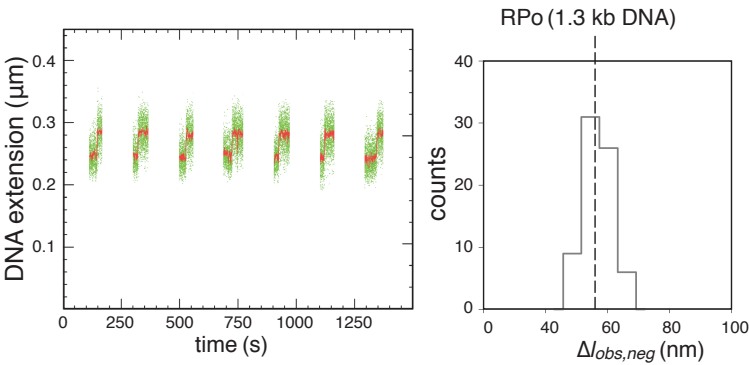

C

|                    | $\Delta \bar{l}_{obs,pos}$ (nm) | $\Delta \bar{l}_{obs,neg}$ (nm) | unwinding (bp) |
|--------------------|---------------------------------|---------------------------------|----------------|
| 2.0 kb DNA segment | 63±5                            | 57±5                            | 11±1           |
| 1.3 kb DNA segment | 67±3                            | 56±3                            | 11±0.5         |
