# Supplementary material for: The mechanism of variability in transcription start site selection
Source: eLife journal article supplement (doi:10.7554/elife.32038), 2017-11-23
Supplement: supp [file elife_poa_e32038_Figure_6_figure_supplement_1.pdf › elife_poa_e32038_Figure_6_figure_supplement_1.pdf]

Figure 6-figure supplement 1

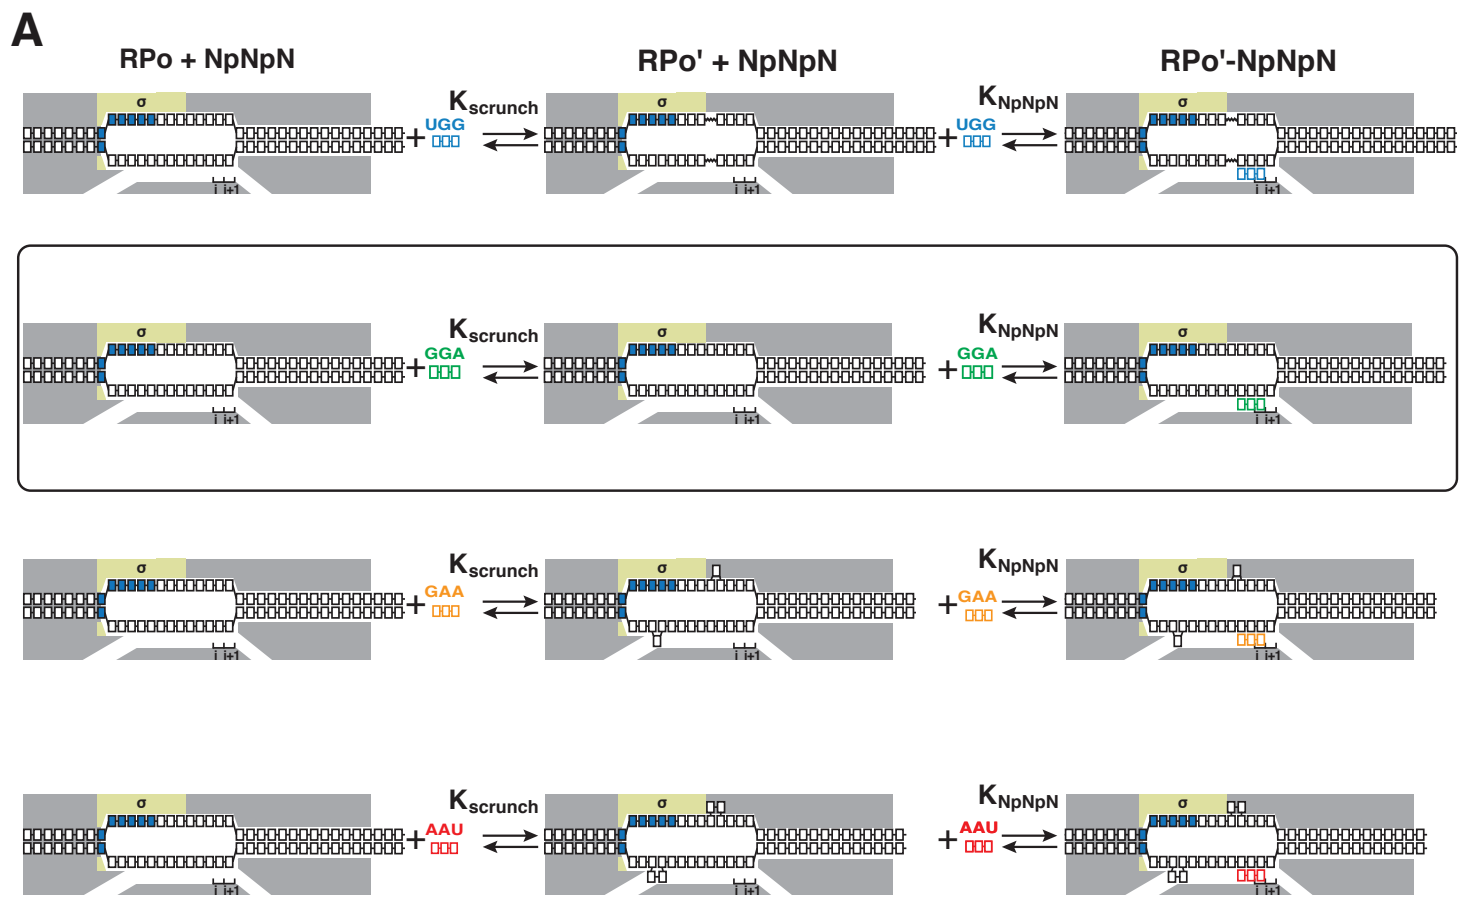

**B**

|                                        | UGG         | GGA        | GAA        | AAU         |
|----------------------------------------|-------------|------------|------------|-------------|
| y-intercept (s)                        | 26±2        | 15±1       | 32±5       | 28±2        |
| slope (s/mM)                           | 14±2        | 26000±1000 | 22000±4000 | 27±3        |
| $K_{\text{NpNpN}}$ (mM <sup>-1</sup> ) | 12±3        | 1700±200   | 2800±900   | 18±4        |
| $\Delta G_{\text{NpNpN}}$ (kcal/mol)   | -5.6±0.2    | -8.6±0.1   | -8.9±0.2   | -5.9±0.2    |
| $K_{\text{scrunch}}$                   | 0.048±0.008 | [1]        | 0.33±0.07  | 0.056±0.009 |
| $\Delta G_{\text{scrunch}}$ (kcal/mol) | 1.8±0.1     | [0]        | 0.7±0.1    | 1.7±0.1     |
