# Supplementary figures and images for: The mechanism of variability in transcription start site selection
Source: eLife journal article supplement (doi:10.7554/elife.32038), 2017-11-23

## Figure 1-figure supplement 1

**A**

**trailing edge**

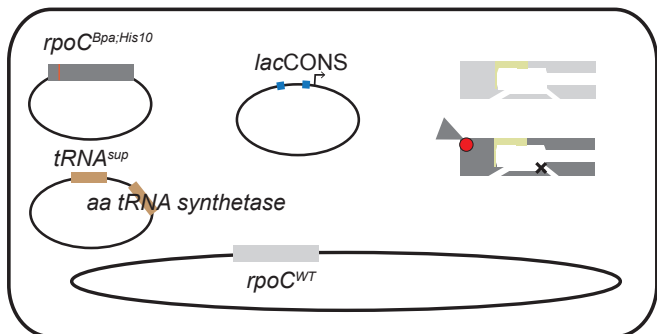

**leading edge**

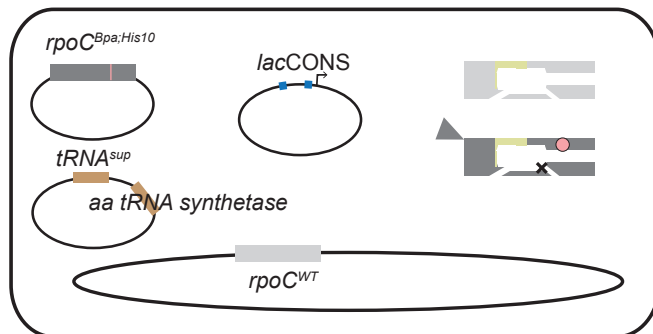

# B

**trailing edge**

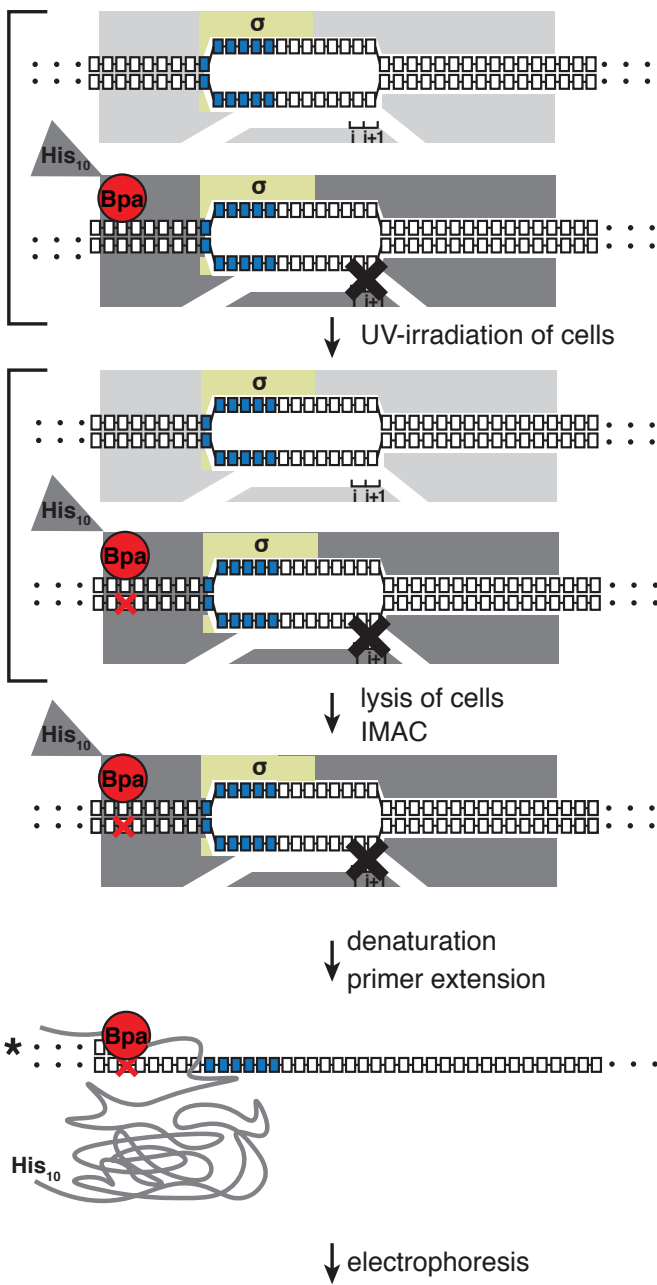

**leading edge**

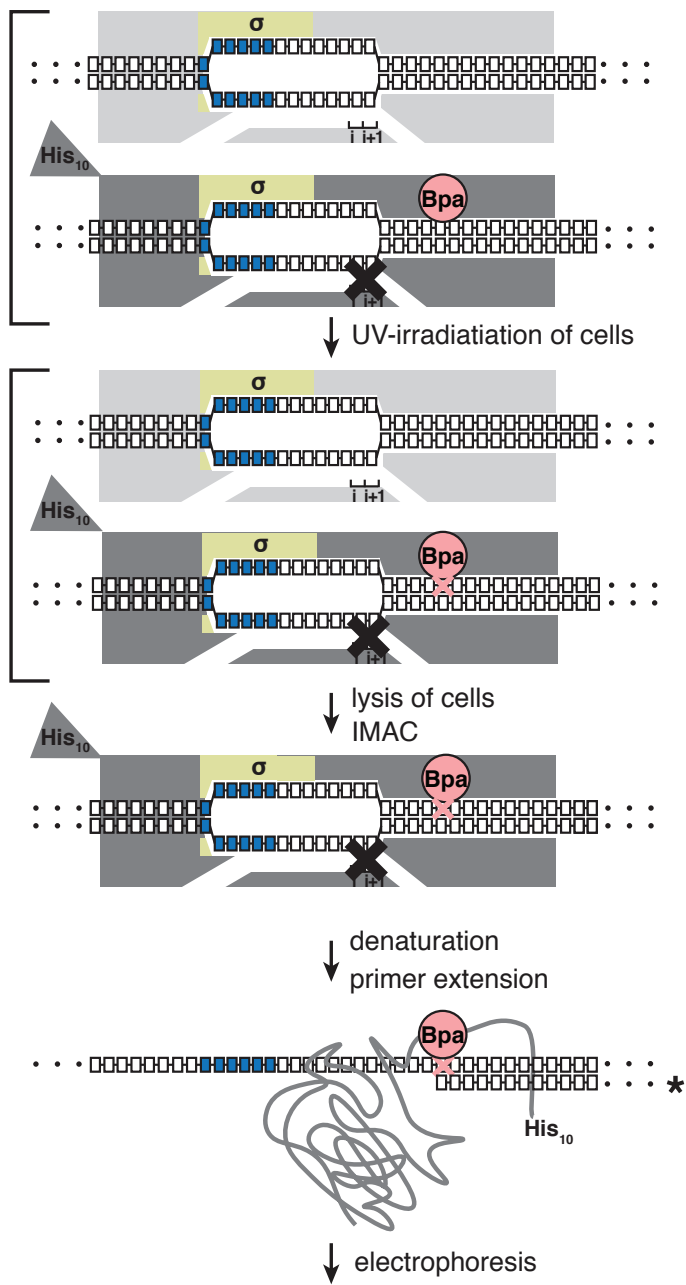

Supplement: supp [file elife_poa_e32038_Figure_1_figure_supplement_1.pdf › elife_poa_e32038_Figure_1_figure_supplement_1.pdf]

# Figure 1-figure supplement 2

**A**

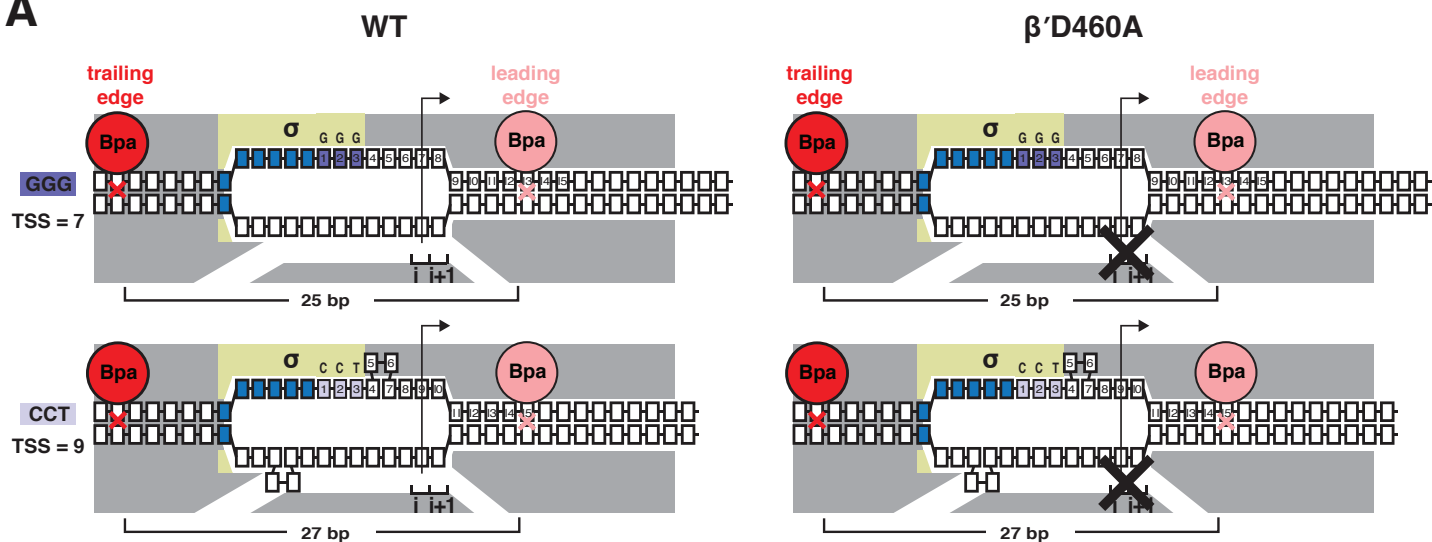

**B**

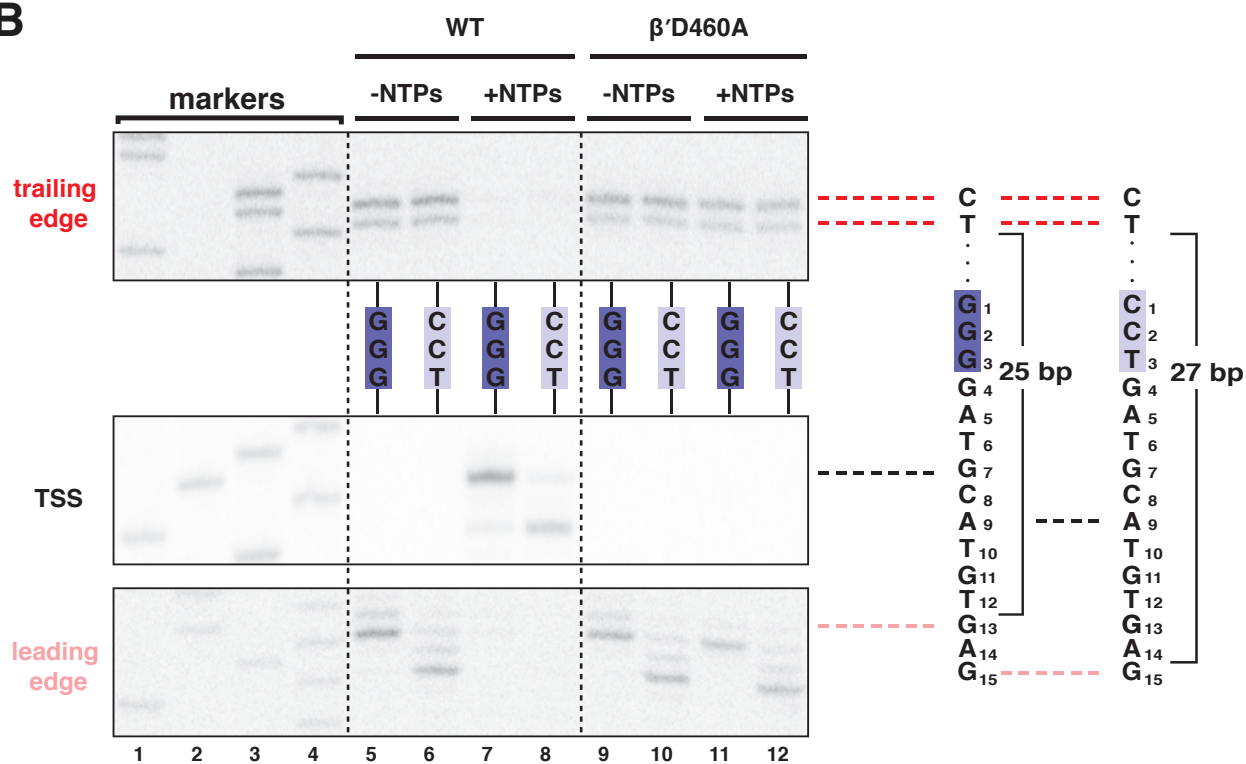

Supplement: supp [file elife_poa_e32038_Figure_1_figure_supplement_2.pdf › elife_poa_e32038_Figure_1_figure_supplement_2.pdf]

Figure 3-figure supplement 1

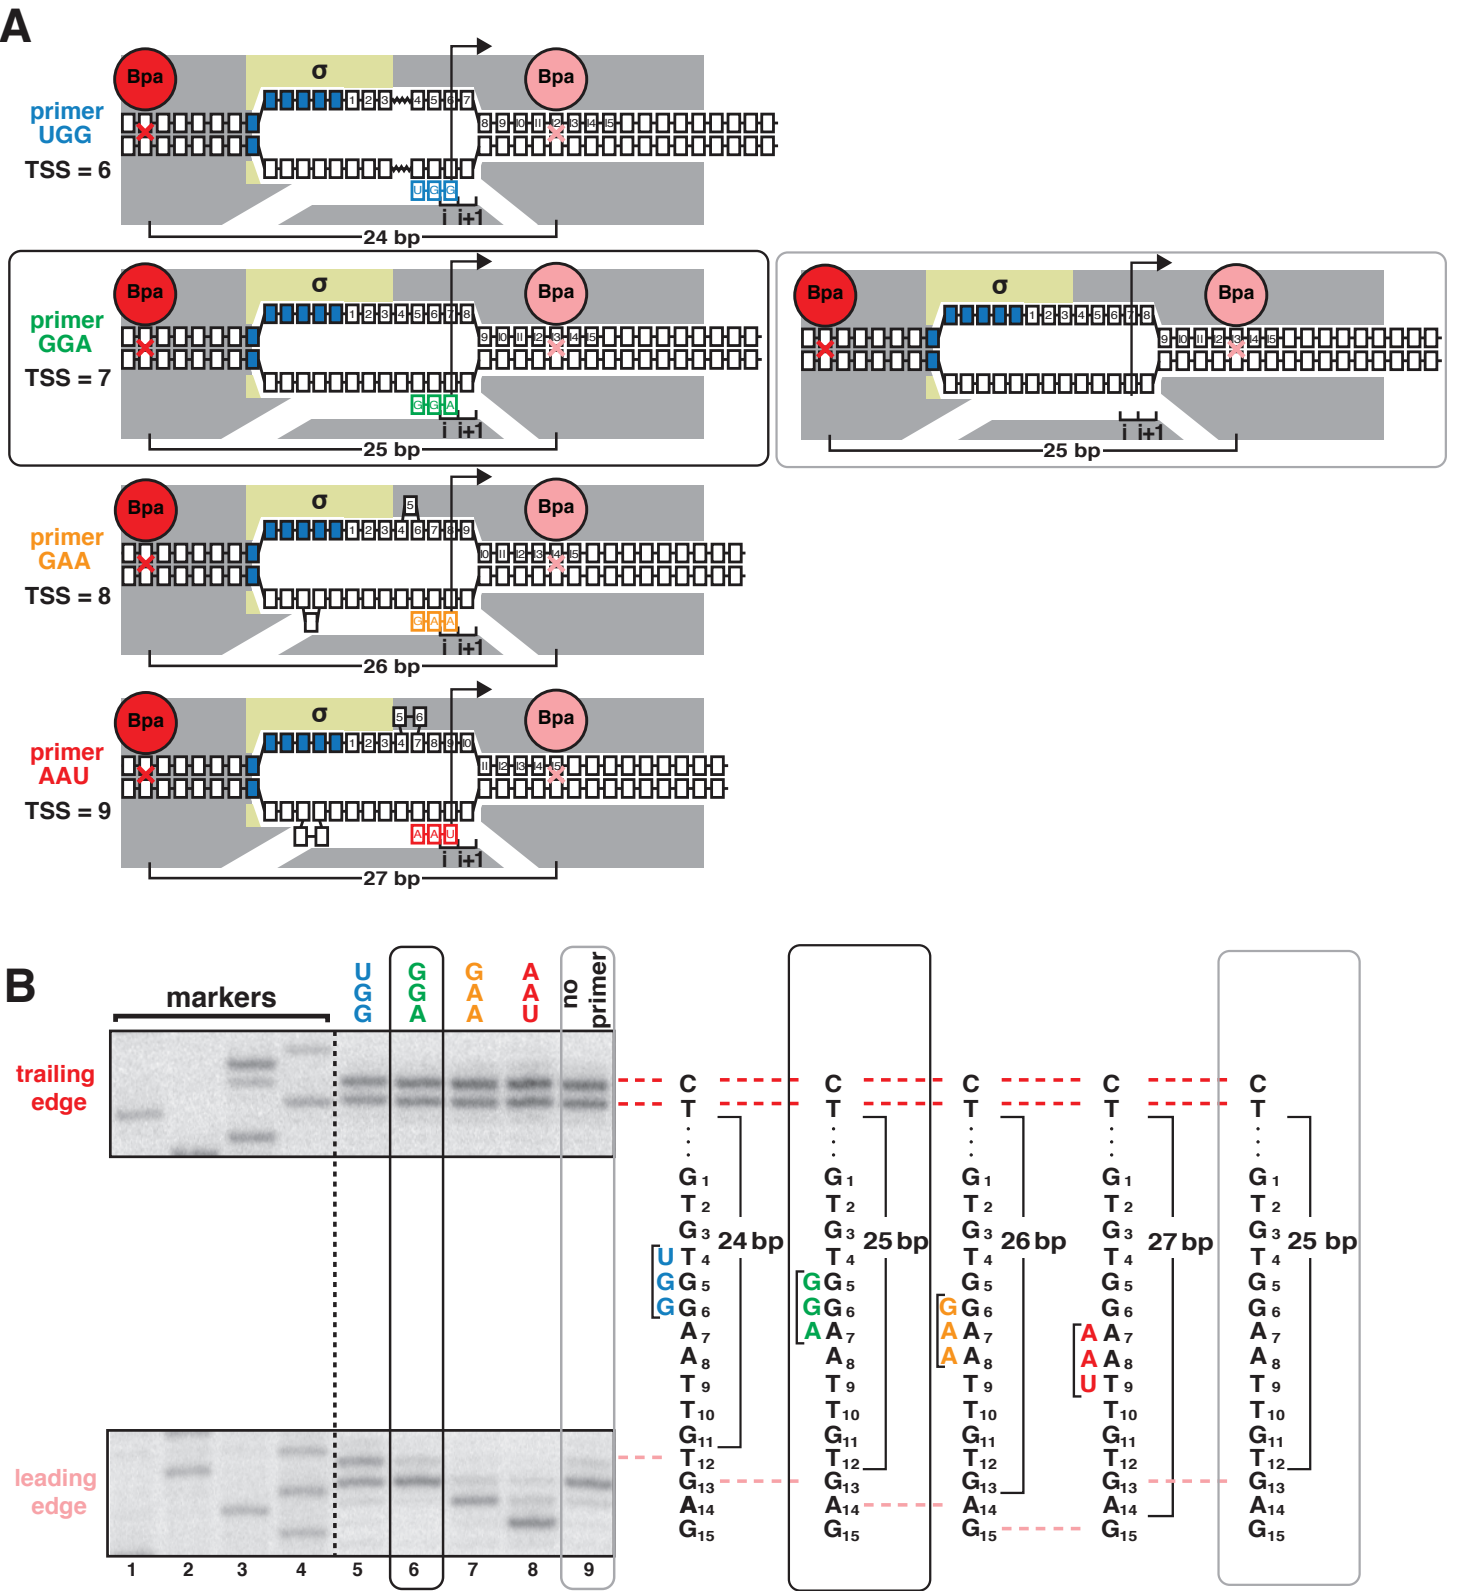

Supplement: supp [file elife_poa_e32038_Figure_3_figure_supplement_1.pdf › elife_poa_e32038_Figure_3_figure_supplement_1.pdf]

Figure 4-figure supplement 2

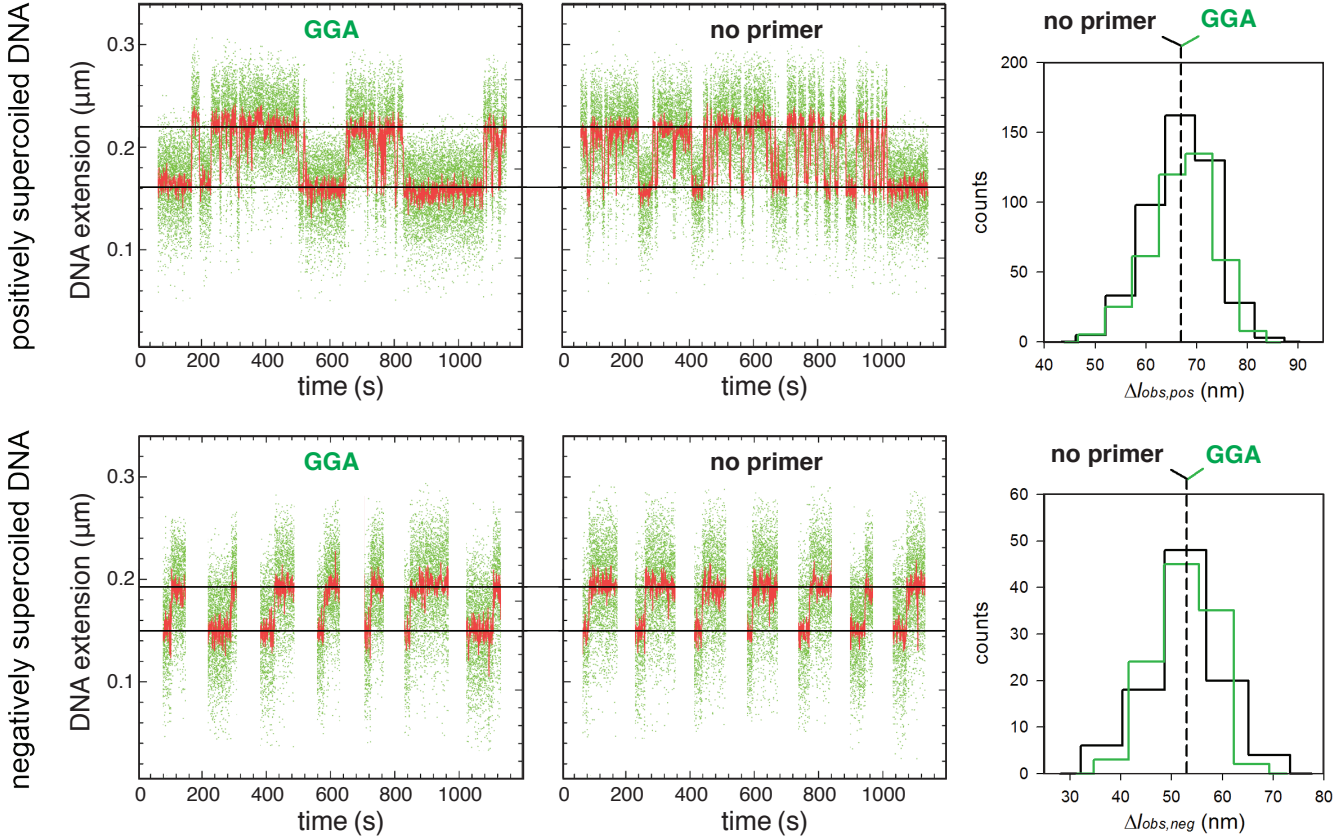

Supplement: supp [file elife_poa_e32038_Figure_4_figure_supplement_2.pdf › elife_poa_e32038_Figure_4_figure_supplement_2.pdf]
